# Supplementary material for: Enhancing Centelloside Production in Centella asiatica Hairy Root Lines through Metabolic Engineering of Triterpene Biosynthetic Pathway Early Genes
Source: MDPI journal article supplement (doi:10.3390/plants12193363), 2023-09-23
Supplement: s1 [file s1]

## Supplementary Material

# Enhancing Centelloside Production in *Centella asiatica* Hairy Root Lines through Metabolic Engineering of Triterpene Biosynthetic Pathway Early Genes

Miguel Angel Alcalde<sup>1,2</sup>, Javier Palazon<sup>1\*</sup>, Mercedes Bonfill<sup>1</sup>, Diego Hidalgo-Martinez<sup>1,\*</sup>

- <sup>1</sup> Department of Biology, Healthcare and the Environment, Faculty of Pharmacy and Food Sciences, University of Barcelona, 08028 Barcelona, Spain; miguel.psr.94@gmail.com (M.A.); mbonfill@ub.edu (M.B.)  
<sup>2</sup> Biotechnology, Health and Education Research Group, Posgraduate School, Cesar Vallejo University, Trujillo, Peru.  
\* Correspondence: dhidalgo@ub.edu (D.H.); javierpalazon@ub.edu (J.P.)

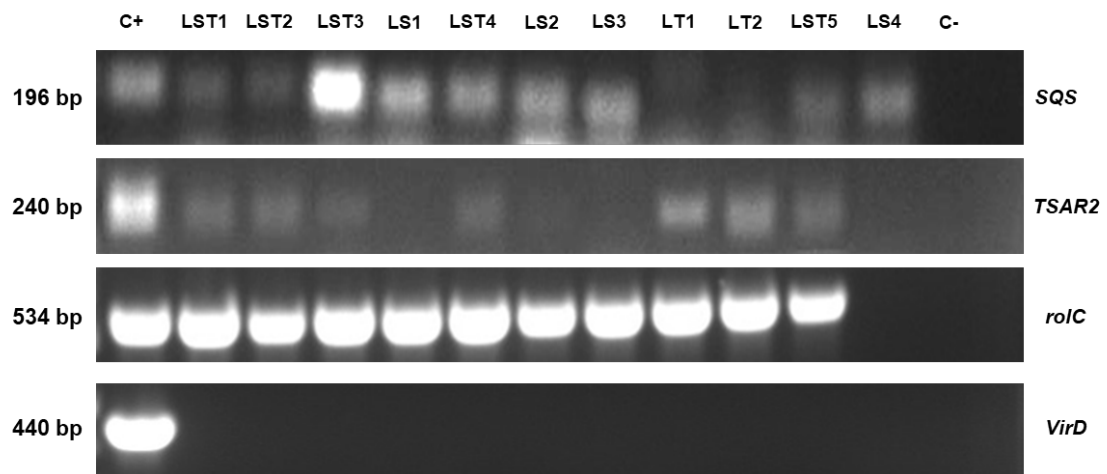

**Figure S1.** PCR analysis: detection of *SQS*, *TSAR2*, *rolC* and *VirD* genes in different *C. asiatica* transgenic root lines.

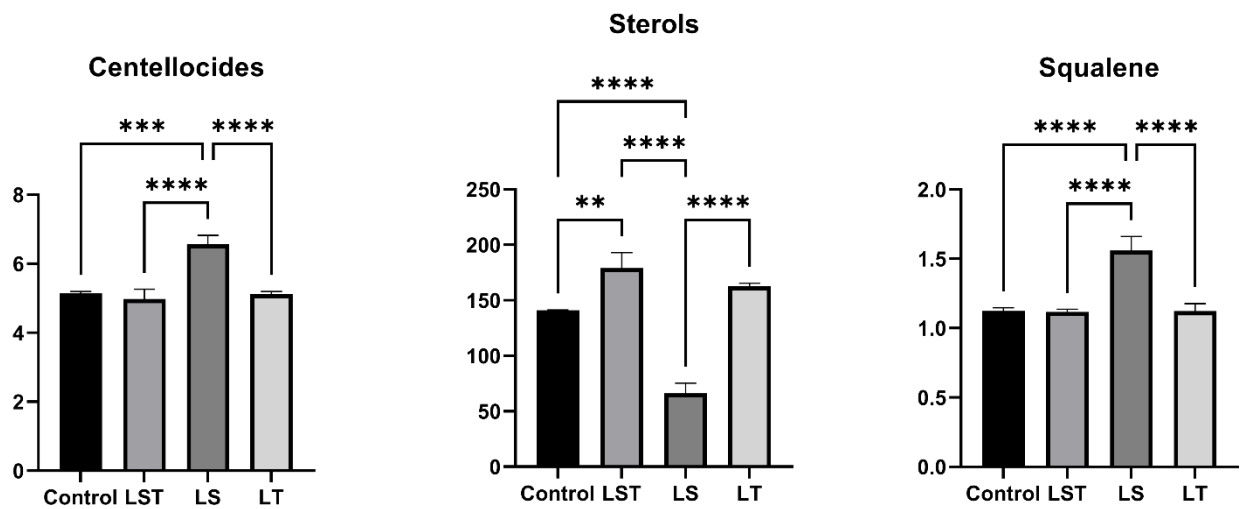

**Figure S2.** Statistical differences between different types of lines.

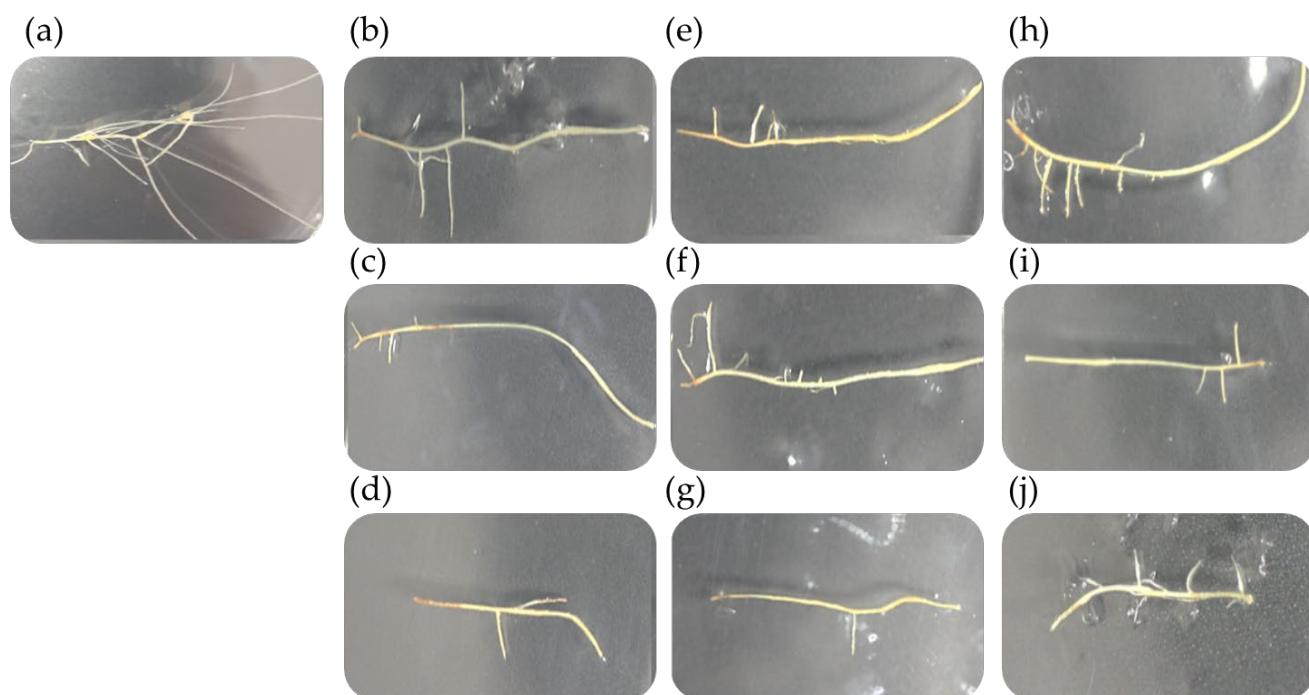

**Figure S3.** Morphology of different transformed root lines of *C. asiatica* on day 14 of their growth: (a) Control, (b) LST-1, (c) LST-2, (d) LST-3, (e) LS-1, (f) LS-2, (g) LS-3, (h) LT-1, (i) LT2 and (j) LT-3. The initial inoculum was a small section of 10 mg of fresh weight.

**Table S1:** Quantitative data for gene expression and metabolite profiling.

| Type of Line | Gene expression (fold change) |      |            |      |               |      |                            |      | Metabolites                     |                                    |                         |      |        |       |
|--------------|-------------------------------|------|------------|------|---------------|------|----------------------------|------|---------------------------------|------------------------------------|-------------------------|------|--------|-------|
|              | <i>HMGR</i>                   |      | <i>SQS</i> |      | <i>At-SQS</i> |      | <i>SQS</i> + <i>At-SQS</i> |      | Centellosides content (mg/g DW) | Squalene content (mg/g dry weight) | Total Sterols (mg/g DW) |      |        |       |
|              | mean                          | SD   | mean       | SD   | mean          | SD   | mean                       | SD   | mean                            | SD                                 | mean                    | SD   | mean   | SD    |
| Control      | 1.00                          | 0.00 | 1.00       | 0.00 | 0.00          | 0.00 | 1.00                       | 0.00 | 5.14                            | 0.06                               | 1.12                    | 0.02 | 141.12 | 0.23  |
| LST          | 1.79                          | 0.20 | 1.37       | 0.25 | 1.52          | 0.15 | 2.88                       | 0.39 | 4.98                            | 0.29                               | 1.12                    | 0.02 | 179.17 | 13.92 |
| LST          | 0.73                          | 0.09 | 0.96       | 0.08 | 1.50          | 0.04 | 2.46                       | 0.07 | 6.56                            | 0.26                               | 1.56                    | 0.10 | 66.20  | 9.12  |
| LT           | 1.78                          | 0.30 | 1.48       | 0.13 | 0.00          | 0.00 | 1.48                       | 0.13 | 5.11                            | 0.08                               | 1.12                    | 0.05 | 162.85 | 2.74  |

**Table S2.** Primers used for confirmation of transformed roots.

| Gene          | Primer sequence                                        | Temperature melting (°C) | Amplicon size (pb) | Accession number                                                          |
|---------------|--------------------------------------------------------|--------------------------|--------------------|---------------------------------------------------------------------------|
| <i>rolC</i>   | F: TAACATGGCTGAAGACGACC<br>R: AAACCTGCACTCGCCATGCC     | 60                       | 534                | KX986281.1<br>( <i>R. rhizogenes</i> A4)                                  |
| <i>At-SQS</i> | F: TGGGGAGCTTGGGGACGATGC<br>R: CGGCGTTACGGAGCTCGGTGTT  | 58                       | 196                | Mirjalili et al. [26] -<br>NM_119630.4<br>( <i>Arabidopsis thaliana</i> ) |
| <i>TSAR2</i>  | F: CCCCAAATTCATCCCCTACT<br>R: CAAGAGCTGCAAGAGCAATG     | 60                       | 240                | KR349466.1<br>( <i>Medicago truncatula</i> )                              |
| <i>VirD</i>   | F: GGAGTCTTTCAGCATGGAGCAA<br>R: GGAGTCTTTCAGCATGGAGCAA | 56                       | 440                | KX986281.1<br>( <i>R. rhizogenes</i> A4)                                  |

**Table S3.** Primers used for gene expression analysis.

| Gene                                                   | Primer sequence                                      | Temperature melting (°C) | Amplicon size (pb) | Accession number                           |
|--------------------------------------------------------|------------------------------------------------------|--------------------------|--------------------|--------------------------------------------|
| 3-hydroxy-3-methylglutaryl coenzyme A reductase (HMGR) | F: CTCCTTCGTA CTCCCTCGAGTC<br>R: CCCGTCCAGTGACTTTCAG | 60                       | 101                | KJ939450.2<br>( <i>Centella asiatica</i> ) |
| Squalene synthase (SQS)                                | F: TGAGGAGAATTCCGGTCAAGG<br>R: GCACAAAACCGGAAGATAGC  | 60                       | 126                | AY787628.1<br>( <i>Centella asiatica</i> ) |
| beta-amyrin synthase ( $\beta$ -AS)                    | F: TTACGTTTGCTGGGAGAAGG<br>R: TATACCCCAAGAACCGCAAG   | 60                       | 134                | AY520818.1<br>( <i>Centella asiatica</i> ) |
| CYP716A83 (CYP83)                                      | F: TAGCTCTGCATGCACTTTTCG<br>R: CCAGGTCCCTTTGATTTCAC  | 60                       | 105                | KU878849.1<br>( <i>Centella asiatica</i> ) |
| CYP714E19 (CYP19)                                      | F: AACCACACACACATCCTTGG<br>R: TCCTTTGATGAGCCCAAGAC   | 60                       | 116                | KU878852.1<br>( <i>Centella asiatica</i> ) |
| CYP716C11 (CYP11)                                      | F: CCCGATTCAACGACTCTTTC<br>R: CCGGTTGTTTGATCGACTTC   | 60                       | 104                | KU878852.1<br>( <i>Centella asiatica</i> ) |
| UGT73AD1 (UGT)                                         | F: TCTGGAAGCAGTTTGTGAGG<br>R: CGCCAATCTTCACTACATCG   | 59                       | 101                | KP195716.1<br>( <i>Centella asiatica</i> ) |
| <i>rolA</i>                                            | F: GAATGGCCCAGACCTTTGGA<br>R: TTGGTCAGGGAGGAAATCGC   | 60                       | 116                | EF433766.1<br>( <i>R. rhizogenes</i> A4)   |
| <i>rolB</i>                                            | F: CAACCGGATTTGGCCAGAGA<br>R: ATAGGGTTGCATCGTGGTTCG  | 60                       | 135                | EF433766.1<br>( <i>R. rhizogenes</i> A4)   |
| <i>rolC</i>                                            | F: CGCGCTCATCACCAATCTTC<br>R: ACAGAAAGTGCGGCGAAGTA   | 60                       | 135                | EF433766.1<br>( <i>R. rhizogenes</i> A4)   |
| <i>aux1</i>                                            | F: TTCGAAGGAAGCTTGTGAGAA<br>R: CTTAAATCCGTGTGACCATAG | 60                       | 350                | M61151.1<br>( <i>R. rhizogenes</i> A4)     |
| <i>aux2</i>                                            | F: GAACCACAAACCCAAGACGC<br>R: CTGTGGCGAAGTTGTTGCTC   | 60                       | 125                | M61151.1<br>( <i>R. rhizogenes</i> A4)     |
| $\beta$ -actin                                         | F: TGACAATGGAAGTGGGAATGG<br>R: CAACAATACTGGGGAACACT  | 58                       | 80                 | KF699319.1<br>( <i>Panax ginseng</i> )     |
